# Supplementary material
Source: publisher site journal article supplement (https://www.dovepress.com/get_supplementary_file.php?f=496266.docx)
Supplement: Supplementary file 1 [file get_supplementary_file.php]

**Supplementary File 1**

**Nursing care performance indicators and patient outcomes**

**Nursing Performance indicators:**

1. Nursing Performance (Morse Fall Risk)
2. Nursing Performance (Medication Rights)
3. Nursing Performance (Patient Surveillance)
4. Nursing Performance (Hand Hygiene)
5. Nursing Performance (Asepsis)
6. Nursing Performance (Central Line Care Management)
7. Nursing Performance (ventilation Management)
8. Nursing Performance (Catheter Management)
9. Nursing Performance (Safe Handling of Chemotherapy)
10. Consistent Delivery of Nursing Care Against Identified Need
11. Meeting patient Needs (e.g., Pain Control)
12. Avoiding Unnecessary Intervention (e.g., NGT)
13. Incomplete Assessment
14. Failure to Identify Risk Factors
15. Failure to Respond to Risk Factors

**Patient outcomes**

1. Falls
2. Medication Errors
3. HAI (Pulmonary Infection)
4. HAI (UTI)
5. HAI (IV Infection)
6. Extravasation
7. Pressure Injury
8. Failure to Rescue
9. Empowering Patient (Knowledge Gained)
10. Empowering Patient (Attitude Changed)
11. Empowering Patient (Skills Acquired)
12. Empowering Patient (Behavior Adapted)
13. Patient Satisfaction (Patient’s Confidence in the Knowledge and Skills of the Nurse)
14. Patient Satisfaction (Patient’s Sense of Safety whilst under the Care of the Nurse)
15. Patient Centeredness (Patient Respect)
16. Patient Centeredness (Patient Involvement in Decision Making about Nursing care)
17. Patient Centeredness (Time spent by Nurses with the Patient)
18. Patient Centeredness (Respect from the Nurse for patient’s preference and choice
19. Patient Centeredness (Nurse Support for Patients to Care for Themselves where Appropriate)
20. Patient Centeredness (Nurse Understanding of What is Important to the Patient)
21. Mortality
22. Complications
23. Changes in the Level of Care
24. Readmission
25. LOS

References:

1. Dall’Ora C, Saville C, Rubbo B, Turner L, Jones J, Griffiths P. Nurse staffing levels and patient outcomes: A systematic review of longitudinal studies. *International Journal of Nursing Studies*. 2022;134. doi:10.1016/j.ijnurstu.2022.104311
2. Needleman J, Buerhaus P, Pankratz VS, Leibson CL, Stevens SR, Harris M. Nurse staffing and inpatient hospital mortality. *The New England journal of medicine*. 2011;364(11):1037-1045. doi:10.1056/NEJMsa1001025
3. Phelan EA, Mahoney JE, Voit JC, Stevens JA. Assessment and management of fall risk in primary care settings. *The Medical clinics of North America*. 2015;99(2):281-293. doi:10.1016/j.mcna.2014.11.004
4. Recio-Saucedo A, Dall’Ora C, Maruotti A, et al. What impact does nursing care left undone have on patient outcomes? Review of the literature. *Journal of Clinical Nursing*. 2018;27(11-12):2248-2259. doi:10.1111/jocn.14058
